# Supplementary material
Source: Springer Nature journal article supplement (https://www.springermedizin.de/resource/supplementary/12889_2013_6717_MOESM2_ESM.pdf/9498944)

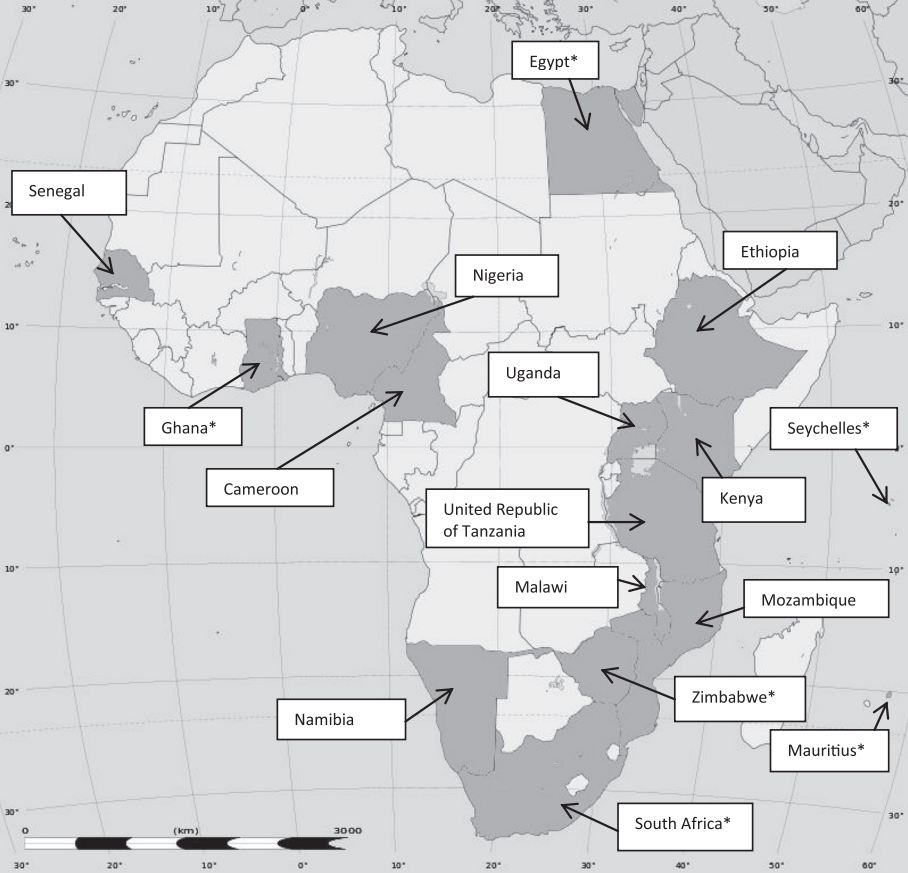

Supplement: MOESM2 [file 9498944]
